# Supplementary material for: Evaluation of variability in target volume delineation for newly diagnosed glioblastoma: a multi-institutional study from the Korean Radiation Oncology Group
Source: Springer Nature journal article supplement (doi:10.1186/s13014-015-0439-z), 2015-07-01
Supplement: MOESM1 [file 9773886]

**Supplementary 1 Individual factors included in the GTV and CTV of each case**

| Case    | Surgical cavity <sup>a</sup> |     | T2-HSI |        |
|---------|------------------------------|-----|--------|--------|
|         | GTV                          | GTV | GTV    | CTV    |
| Case 1  | 93.30%                       |     | 13.30% | 80.00% |
| Case 2  | STBx only                    |     | 20.00% | 93.30% |
| Case 3  | 100%                         |     | 6.70%  | 53.30% |
| Case 4  | 73.30%                       |     | 20.00% | 66.70% |
| Case 5  | STBx only                    |     | 6.70%  | 26.70% |
| Case 6  | 66.70%                       |     | 86.70% | 100%   |
| Case 7  | 66.70%                       |     | 86.70% | 100%   |
| Case 8  | STBx only                    |     | 60.00% | 100%   |
| Case 9  | 66.70%                       |     | 6.70%  | 53.30% |
| Overall | 81.10%                       |     | 34.80% | 74.80% |

GTV: gross tumor volume.

CTV: clinical tumor volume.

STBx: stereotactic biopsy.

T2-HSI: T2-high signal intensity.

<sup>a</sup>Surgical cavity is defined as surgical resection margin plus the dead space resulted by brain tissue resection.
