# Supplementary material for: Evaluation of variability in target volume delineation for newly diagnosed glioblastoma: a multi-institutional study from the Korean Radiation Oncology Group
Source: Springer Nature journal article supplement (doi:10.1186/s13014-015-0439-z), 2015-07-01
Supplement: MOESM2 [file 9773886]

**Supplementary 2 Modification of CTVs in regards of potential anatomical barriers**

|       | Case 1         |      |                | Case 2 |      |      | Case 3 |      |      | Case 4 |      |      | Case 5 |      |      | Case 6 |      |      | Case7 |      |      | Case8 |      |      | Case 9 |      |      | Mean |      |
|-------|----------------|------|----------------|--------|------|------|--------|------|------|--------|------|------|--------|------|------|--------|------|------|-------|------|------|-------|------|------|--------|------|------|------|------|
|       | F              | T    | VS             | F      | T    | VS   | F      | T    | VS   | F      | T    | VS   | F      | T    | VS   | F      | T    | VS   | F     | T    | VS   | F     | T    | VS   | F      | T    | VS   |      |      |
| RO 1  | 1 <sup>a</sup> | 1    | 0 <sup>b</sup> | 1      | 1    | 0    | 1      | 1    | 1    | 1      | 1    | 0    | 1      | 1    | 0    | 1      | 1    | 0    | 1     | 1    | 0    | 1     | 1    | 1    | 1      | 1    | 1    | 1    | 0.78 |
| RO 2  | 1              | 1    | 1              | 1      | 1    | 0    | 1      | 1    | 1    | 1      | 1    | 0    | 1      | 1    | 0    | 1      | 1    | 0    | 1     | 1    | 1    | 0     | 1    | 0    | 1      | 1    | 1    | 0.78 |      |
| RO 3  | 1              | 1    | 1              | 1      | 1    | 1    | 1      | 1    | 0    | 1      | 1    | 1    | 1      | 1    | 1    | 1      | 1    | 1    | 1     | 1    | 1    | 0     | 1    | 0    | 1      | 1    | 1    | 0.89 |      |
| RO 4  | 1              | 1    | 1              | 1      | 1    | 1    | 1      | 1    | 1    | 1      | 1    | 1    | 1      | 1    | 1    | 1      | 1    | 1    | 1     | 1    | 1    | 1     | 1    | 1    | 1      | 1    | 1    | 1.00 |      |
| RO 5  | 1              | 1    | 1              | 1      | 1    | 0    | 1      | 1    | 0    | 1      | 1    | 0    | 1      | 1    | 0    | 1      | 1    | 0    | 1     | 1    | 1    | 0     | 0    | 0    | 1      | 1    | 1    | 0.70 |      |
| RO 6  | 1              | 1    | 0              | 0      | 0    | 0    | 1      | 1    | 0    | 1      | 1    | 1    | 1      | 1    | 0    | 1      | 1    | 0    | 0     | 1    | 0    | 0     | 0    | 0    | 1      | 1    | 1    | 0.56 |      |
| RO 7  | 0              | 0    | 0              | 0      | 0    | 0    | 0      | 1    | 0    | 0      | 0    | 0    | 1      | 1    | 0    | 0      | 0    | 0    | 0     | 0    | 0    | 0     | 0    | 0    | 1      | 0    | 0    | 0.15 |      |
| RO 8  | 1              | 1    | 0              | 1      | 1    | 0    | 1      | 1    | 1    | 0      | 0    | 0    | 1      | 1    | 0    | 1      | 0    | 1    | 1     | 1    | 0    | 0     | 0    | 0    | 1      | 1    | 1    | 0.59 |      |
| RO 9  | 1              | 1    | 1              | 1      | 1    | 1    | 1      | 1    | 1    | 1      | 1    | 0    | 1      | 1    | 0    | 1      | 1    | 1    | 1     | 1    | 1    | 0     | 0    | 0    | 1      | 1    | 1    | 0.81 |      |
| RO 10 | 1              | 1    | 1              | 1      | 0    | 0    | 1      | 1    | 0    | 0      | 0    | 0    | 1      | 1    | 0    | 1      | 1    | 0    | 1     | 0    | 1    | 0     | 0    | 0    | 1      | 0    | 0    | 0.48 |      |
| RO 11 | 1              | 1    | 0              | 1      | 1    | 0    | 1      | 1    | 0    | 1      | 1    | 0    | 1      | 1    | 0    | 1      | 1    | 0    | 1     | 1    | 0    | 1     | 0    | 0    | 1      | 1    | 0    | 0.63 |      |
| RO 12 | 1              | 1    | 0              | 1      | 1    | 0    | 1      | 1    | 0    | 1      | 1    | 1    | 1      | 1    | 0    | 1      | 1    | 0    | 1     | 1    | 0    | 1     | 1    | 1    | 1      | 1    | 0    | 0.74 |      |
| RO 13 | 1              | 1    | 0              | 0      | 0    | 0    | 0      | 1    | 0    | 0      | 0    | 0    | 1      | 1    | 0    | 0      | 0    | 0    | 0     | 0    | 0    | 0     | 0    | 0    | 0      | 1    | 0    | 0.22 |      |
| RO 14 | 1              | 1    | 1              | 1      | 1    | 1    | 1      | 1    | 0    | 0      | 0    | 0    | 1      | 1    | 0    | 1      | 1    | 0    | 1     | 1    | 1    | 0     | 0    | 0    | 1      | 1    | 0    | 0.63 |      |
| RO 15 | 1              | 0    | 0              | 1      | 0    | 0    | 1      | 1    | 0    | 0      | 0    | 0    | 0      | 0    | 0    | 1      | 0    | 0    | 1     | 0    | 0    | 0     | 0    | 0    | 1      | 0    | 0    | 0.27 |      |
| Mean  | 0.93           | 0.87 | 0.47           | 0.80   | 0.67 | 0.27 | 0.87   | 0.80 | 0.33 | 0.60   | 0.60 | 0.27 | 0.93   | 0.93 | 0.13 | 0.87   | 0.73 | 0.27 | 0.80  | 0.73 | 0.47 | 0.27  | 0.33 | 0.20 | 0.93   | 0.80 | 0.53 |      |      |

Abbreviations; RO, radiation oncologist; F, falx; T, tentorium; VS, ventricular space.

<sup>a</sup>modified; <sup>b</sup>not modified.
